# Supplementary material for: Specialized Service Use for Psychiatric and Neurodevelopmental Disorders by Age 14 in Finland
Source: Atypon-hosted journal article supplement (doi:10.1176/appi.ps.201200544), 2013-12-16

## APPENDIX

### SUPPORTING DOCUMENT TO

Specialized service use for psychiatric and neurodevelopmental disorders by age 14 in Finland

### SUPPLEMENTAL TABLE

Supplemental Table. Specialized service use for specific diagnoses among all Finnish singletons born in year 1981 (age 14 in year 2010, n=58,538).

| Main group and subgroups (ICD-10 codes)                                            | Total N | Cumulative incidence         |                |
|------------------------------------------------------------------------------------|---------|------------------------------|----------------|
|                                                                                    |         | % of main group <sup>a</sup> | until 2010 (%) |
| Learning and coordination disorders (F80-F83)                                      | 3,197   |                              |                |
| Disorders of speech and language (F80)                                             | 1,680   | 52.5                         | 2.9            |
| Disorders of scholastic skills (F81)                                               | 981     | 30.7                         | 1.7            |
| Disorders of motor function (F82)                                                  | 617     | 19.3                         | 1.1            |
| Mixed disorder of speech and language, scholastic skills, and motor function (F83) | 924     | 28.9                         | 1.6            |
| Anxiety disorders (F40, F41, F42, F93)                                             | 1,259   |                              |                |
| Obsessive-compulsive disorder (F42)                                                | 115     | 9.1                          | .2             |
| Conduct disorders (F91, F92)                                                       | 987     |                              |                |
| Oppositional defiant disorder (F91.3)                                              | 115     | 11.7                         | .2             |
| Autism spectrum disorders (F84)                                                    | 560     |                              |                |
| Childhood autism (F84.0)                                                           | 134     | 23.9                         | .2             |
| Asperger's syndrome (F84.5)                                                        | 251     | 44.8                         | .4             |
| Pervasive developmental disorder not otherwise specified (F84.9)                   | 184     | 32.9                         |                |
| Tic disorders (F95)                                                                | 263     |                              |                |
| Tourette's disorder (F95.2)                                                        | 90      | 34.2                         | .2             |

Abbreviations: ICD-10, International Classification of Diseases, tenth revision.

<sup>a</sup> Some children were given several different diagnoses, that is the sum of the proportions may exceed 100%

## SUPPLEMENTAL FIGURE

### LEGEND

The cumulative incidence of specialized service use between birth (year 1996) and age 14 (year 2010) for the three most common diagnoses of autism spectrum disorders. The legend includes the ICD-10 codes of the disorders. Abbreviation: PDD-NOS, pervasive developmental disorder not otherwise specified.

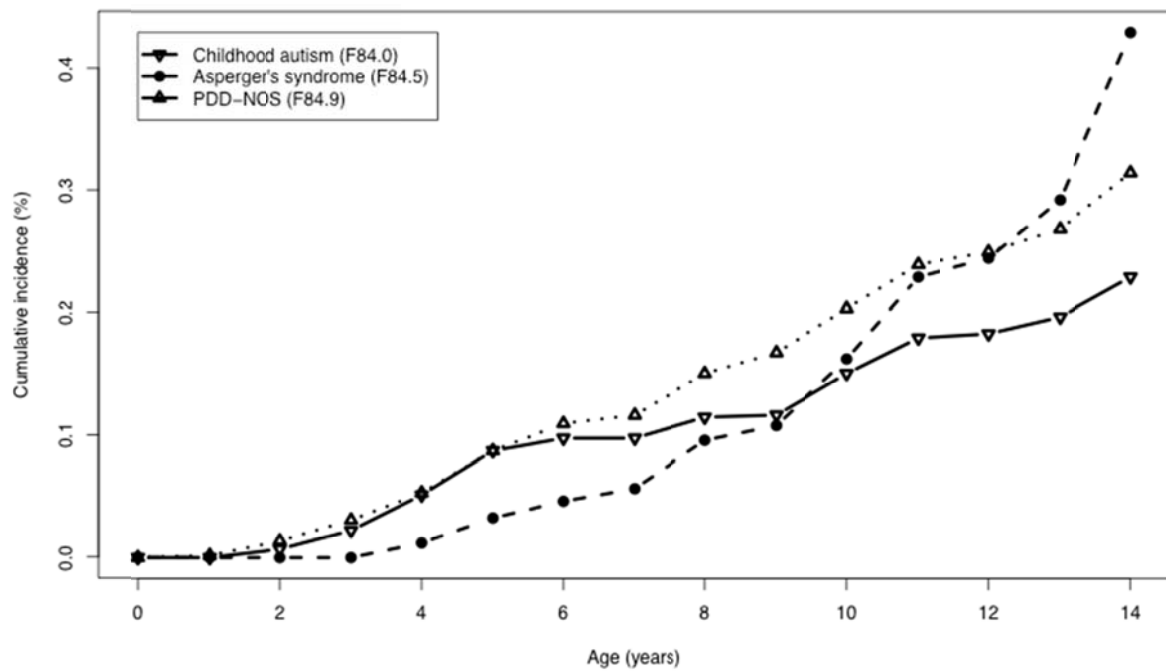

Supplement: 367_ds001.pdf [file 367_ds001.pdf]
